# Supplementary material for: Improving the control of the electroforming process in oxide-based memristive devices by X-ray nanopatterning
Source: Royal Society of Chemistry journal article supplement (doi:10.1039/d4tc01815j), 2024-01-01
Supplement: d4tc01815j1.pdf [file d4tc01815j1.pdf]

## Supporting Information for

# Improving the control of the electroforming process in oxide-based memristive devices by X-ray nanopatterning

Lorenzo Mino<sup>a\*</sup>, Valentina Bonino<sup>b</sup>, Andrea Alessio<sup>c</sup>, Federico Picollo<sup>c</sup>, Andrei Kuncser<sup>d</sup>, Ionel Mercioniu<sup>d</sup>, Aurel-Mihai Vlaicu<sup>d</sup>, Petre Badica<sup>d</sup>, Rosaria Brescia<sup>e</sup>, Matteo Fretto<sup>f</sup>, Kalle Goss<sup>g</sup>, Regina Dittmann<sup>g</sup>, and Marco Truccato<sup>c</sup>

<sup>a</sup> Department of Chemistry, Interdepartmental Centre NIS, University of Torino, via P. Giuria 7, Torino, Italy, 10125, Italy

<sup>b</sup> European Synchrotron Radiation Facility (ESRF), 71 Avenue des Martyrs, BP 220, 38043 Grenoble Cedex 9, France

<sup>c</sup> Department of Physics, University of Torino, Interdepartmental Centre NIS, via P. Giuria 1, Torino, Italy, 10125, Italy

<sup>d</sup> National Institute of Materials Physics, Street Atomistilor 405A, Magurele, Ilfov, 077125, Romania

<sup>e</sup> Electron Microscopy Facility, Italian Institute of Technology (IIT), Via Morego 30, Genova, 16163, Italy

<sup>f</sup> Istituto Nazionale di Ricerca Metrologica (INRiM), Strada delle Cacce 91, 10135 Torino, Italy.

<sup>g</sup> Peter Gruenberg Institute, Forschungszentrum Juelich GmbH and JARA-FIT, Juelich, 52425, Germany.

\*Corresponding author e-mail: lorenzo.mino@unito.it

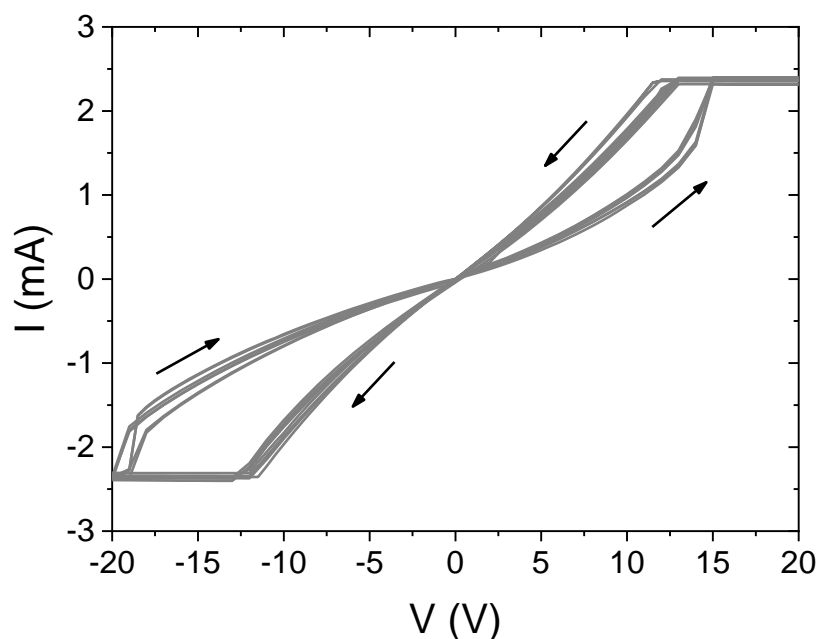

**Figure S1.** I-V curves for multiple ON-OFF cycles showing the reproducibility of the high resistance state and of the low resistance state.

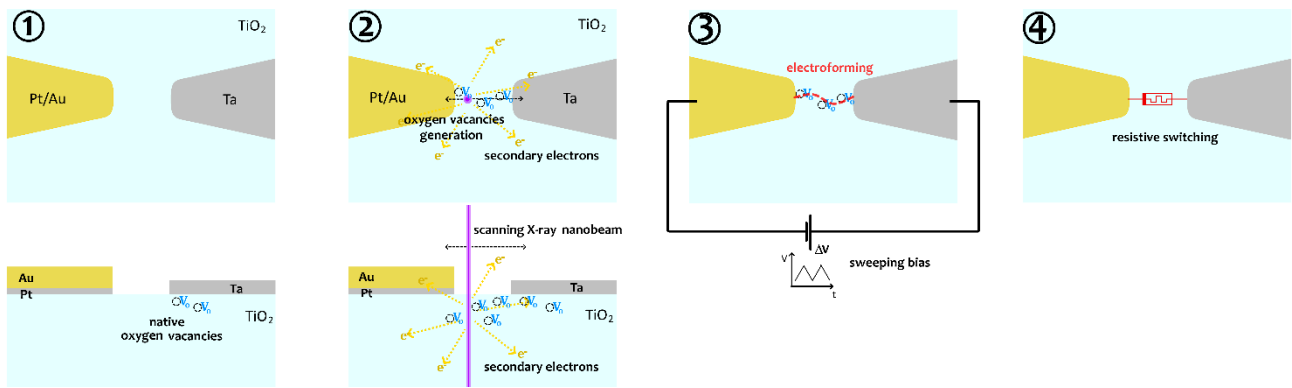

**Figure S2.** Schematic diagram of the different steps of the X-ray nanopatterning process: (1) initial sample state, characterized by the presence of some oxygen vacancies induced by thermal annealing; (2) generation of additional oxygen vacancies by X-ray nanobeam irradiation; (3) application of a suitable bias to achieve electroforming in the line between the electrodes previously irradiated by the X-ray nanobeam; (4) final sample state, which can be switched from a high resistance to a low resistance state and *viceversa*.
